# Supplementary material for: WAVE1 and WAVE2 facilitate human papillomavirus-driven actin polymerization during cellular entry
Source: PubMed Central journal article supplement — bioRxiv. 2024 Oct 29:2024.10.28.620484. Preprint. [Version 1] doi: 10.1101/2024.10.28.620484 (PMC11565777; doi:10.1101/2024.10.28.620484), 2024-10-29

A)

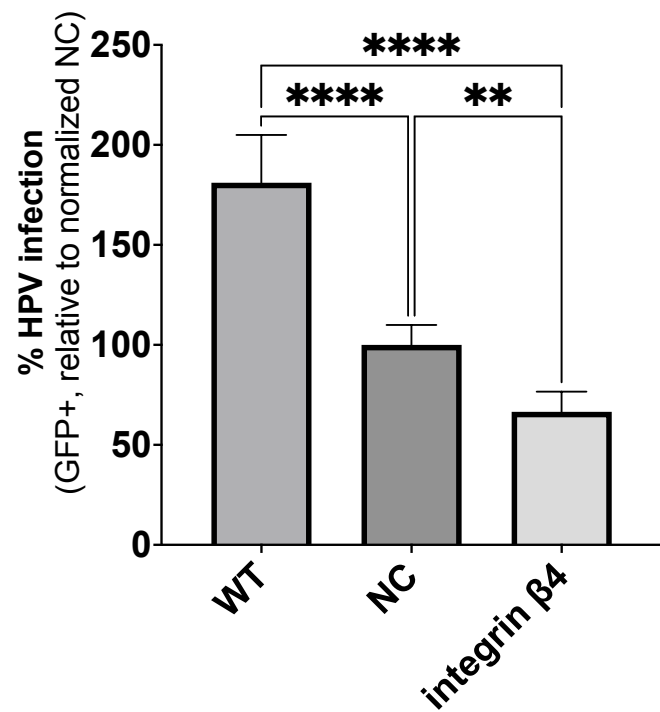

B)

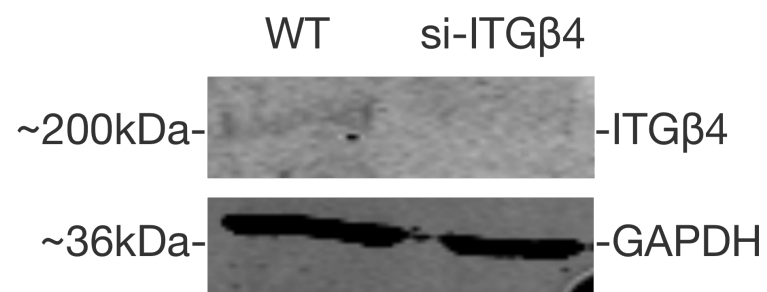

Supplement: media-1.pdf [file media-1.pdf]
